# Supplementary material
Source: HighWire-hosted journal article supplement (http://dmd.aspetjournals.org/highwire/filestream/73153/field_highwire_adjunct_files/0/86363SupplData.pdf)
Supplement: 86363SupplData.pdf [file 86363SupplData.pdf]

Developmental Expression of the Cytosolic Sulfotransferases in Human Liver. Sarah Dubaisi, Joseph A. Caruso, Roger Gaedigk, Carrie A. Vyhlidal, Philip C. Smith, Ronald N. Hines, Thomas A. Kocarek, and Melissa Runge-Morris. Drug Metabolism and Disposition.

**Supplemental Table 1: Donor information for samples analyzed by RT-qPCR**

| Developmental Stage | Sample ID | Sex    | Prenatal Age | Postnatal Age      | Postmortem Interval (hours) |
|---------------------|-----------|--------|--------------|--------------------|-----------------------------|
| Prenatal            | 34        | Female | 18 weeks     |                    | 1                           |
|                     | 40        | Female | 18 weeks     |                    | 1                           |
|                     | 42        | Female | 18 weeks     |                    | 1                           |
|                     | 235       | Female | 19 weeks     |                    | 1                           |
|                     | 246       | Male   | 19 weeks     |                    | 1                           |
|                     | 276       | Male   | 18 weeks     |                    | 1                           |
|                     | 317       | Male   | 19 weeks     |                    | 1                           |
|                     | 893       | Female | 19 weeks     |                    | 2                           |
|                     | 1330      | Female | 18 weeks     |                    | 2                           |
|                     | 1390      | Female | 18 weeks     |                    | 1                           |
| Infant              | 75        | Male   |              | 96 days            | 36                          |
|                     | 82        | Male   |              | 137 days           | 37                          |
|                     | 83        | Male   |              | 69 days            | 27                          |
|                     | 326       | Female |              | 66 days            | 19                          |
|                     | 1102      | Male   |              | 119 days           | 22                          |
|                     | 1472      | Female |              | 118 days           | 19                          |
|                     | 1490      | Female |              | 70 days            | 23                          |
| Adult               | 289       | Male   |              | 24 years, 362 days | 5                           |
|                     | 602       | Male   |              | 27 years, 42 days  | 15                          |
|                     | 819       | Male   |              | 18 years, 217 days | 28                          |
|                     | 1021      | Male   |              | 19 years, 242 days | 14                          |
|                     | 1028      | Male   |              | 39 years, 11 days  | 14                          |
|                     | 1539      | Female |              | 33 years, 177 days | 23                          |
|                     | 5611      | Female |              | 50 years, 183 days | 15                          |

Developmental Expression of the Cytosolic Sulfotransferases in Human Liver. Sarah Dubaisi, Joseph A. Caruso, Roger Gaedigk, Carrie A. Vyhlidal, Philip C. Smith, Ronald N. Hines, Thomas A. Kocarek, and Melissa Runge-Morris. Drug Metabolism and Disposition.

**Supplemental Table 2: Donor information for samples analyzed by RNA-seq**

| Developmental Stage | Sample ID | Sex    | Prenatal Age      | Postnatal Age     | Postmortem Interval (hours) |
|---------------------|-----------|--------|-------------------|-------------------|-----------------------------|
| Prenatal            | 20636     | Male   | 14.7 weeks        |                   | <2                          |
|                     | 21248     | Female | 14.7 weeks        |                   | <2                          |
|                     | 21251     | Male   | 14.7 weeks        |                   | <2                          |
|                     | 21432     | Male   | 16.1 weeks        |                   | <2                          |
|                     | 21601     | Male   | 16.4 weeks        |                   | <2                          |
|                     | 21605     | Male   | 14.7 weeks        |                   | <2                          |
|                     | 21806     | Female | 16.4 weeks        |                   | <2                          |
|                     | 21883     | Male   | 16.4 weeks        |                   | <2                          |
|                     | 21949     | Female | 16.1 weeks        |                   | <2                          |
|                     | 21978     | Female | 15.6 weeks        |                   | <2                          |
| Infant              | 86        | Male   |                   | 56 days           | 11                          |
|                     | 432       | Male   |                   | 4 days            | 2                           |
|                     | 435       | Male   |                   | 274 days          | 10                          |
|                     | 569       | Male   |                   | 133 days          | 16                          |
|                     | 759       | Male   |                   | 35 days           | 7                           |
|                     | 774       | Male   |                   | 273 days          | 10                          |
|                     | 780       | Male   |                   | 0 days            | 13                          |
|                     | 825       | Male   |                   | 334 days          | 11                          |
|                     | 1055      | Male   |                   | 96 days           | 12                          |
|                     | 1157      | Female |                   | 20 days           | 14                          |
|                     | 1281      | Male   |                   | 206 days          | 6                           |
|                     | 1296      | Male   |                   | 98 days           | 16                          |
|                     | 1325      | Female |                   | 182 days          | 18                          |
|                     | 1547      | Male   |                   | 259 days          | 10                          |
| Child               | 64        | Male   |                   | 15 years          | 13                          |
|                     | 346       | Male   |                   | 3 years           | 11.17                       |
|                     | 617       | Female |                   | 1 year, 347 days  | 9                           |
|                     | 677       | Male   |                   | 1 year, 353 days  | 13                          |
|                     | 689       | Female |                   | 5 years           | 19.5                        |
|                     | 792       | Male   |                   | 4 years           | 14.5                        |
|                     | 872       | Male   |                   | 2 years           | 14.5                        |
|                     | 885       | Male   |                   | 17 years          | 12.5                        |
|                     | 1860      | Male   |                   | 8 years, 2 days   | 5                           |
|                     | 8902      | Male   |                   | 7 years           | Surgical specimen           |
|                     | 8906      | Male   |                   | 12 years          | Surgical specimen           |
|                     | 8910      | Male   |                   | 14 years          | Surgical specimen           |
|                     | 8917      | Female |                   | 6 years           | Surgical specimen           |
|                     | 8920      | Male   |                   | 11 years          | Surgical specimen           |
|                     | 8924      | Female |                   | 9 years           | Surgical specimen           |
|                     | 8925      | Male   |                   | 8 years           | Surgical specimen           |
|                     | 8926      | Female |                   | 1 year, 304 days  | Surgical specimen           |
|                     | 8935      | Male   |                   | 17 years          | Surgical specimen           |
|                     | 9003      | Female |                   | 7 years           | Surgical specimen           |
|                     | 9006      | Male   |                   | 10 years          | Surgical specimen           |
| 9011                | Female    |        | 3 years, 183 days | Surgical specimen |                             |
| 9013                | Male      |        | 11 years          | Surgical specimen |                             |

|       |        |                   |                   |
|-------|--------|-------------------|-------------------|
| 9023  | Female | 2 years, 213 days | Surgical specimen |
| 9027  | Male   | 12 years          | Surgical specimen |
| 9032  | Male   | 14 years          | Surgical specimen |
| 9036  | Female | 5 years           | Surgical specimen |
| 9101  | Male   | 2 years           | Surgical specimen |
| 9127  | Male   | 15 years          | Surgical specimen |
| 9608  | Male   | 4 years           | Surgical specimen |
| 9609  | Male   | 4 years           | Surgical specimen |
| 9611  | Male   | 9 years           | Surgical specimen |
| 9612  | Male   | 3 years           | Surgical specimen |
| 70898 | Male   | 7 years           | Not recorded      |
| 70994 | Male   | 16 years          | 24                |
| 71000 | Male   | 6 years           | 12                |
| 71008 | Male   | 13 years          | 24                |
| 71058 | Female | 10 years          | 15                |
| 71281 | Male   | 16 years          | 15                |

---

Developmental Expression of the Cytosolic Sulfotransferases in Human Liver. Sarah Dubaisi, Joseph A. Caruso, Roger Gaedigk, Carrie A. Vyhlidal, Philip C. Smith, Ronald N. Hines, Thomas A. Kocarek, and Melissa Runge-Morris. Drug Metabolism and Disposition.

**Supplemental Table 3: TaqMan Gene Expression Assays used for qRT-PCR**

| <b>Gene</b>  | <b>TaqMan Assay ID</b> |
|--------------|------------------------|
| CYP3A4       | Hs00604506_m1          |
| CYP3A7       | Hs00426361_m1          |
| SULT1A1- TV1 | APFVK4A <sup>1</sup>   |
| SULT1A1- TV5 | Hs00738644_m1          |
| SULT1B1      | Hs00234899_m1          |
| SULT1C2      | Hs00602560_m1          |
| SULT1C3      | Hs01371045_m1          |
| SULT1C4      | Hs00923769_m1          |
| SULT1E1      | Hs00193690_m1          |
| SULT2A1      | Hs00234219_m1          |
| SULT2B1      | Hs00190268_m1          |
| 18S          | 4319413E               |

<sup>1</sup> Custom-designed assay

Developmental Expression of the Cytosolic Sulfotransferases in Human Liver. Sarah Dubaisi, Joseph A. Caruso, Roger Gaedigk, Carrie A. Vyhlidal, Philip C. Smith, Ronald N. Hines, Thomas A. Kocarek, and Melissa Runge-Morris. Drug Metabolism and Disposition.

**Supplemental Table 4: Multiple reaction monitoring (MRM) settings for SULT proteins**

| Protein | Peptide        | Collision Energy (%) | Parent |         |   | Transition |          |   |
|---------|----------------|----------------------|--------|---------|---|------------|----------|---|
|         |                |                      | Label  | m/z     | z | Fragment   | m/z      | z |
| SULT1A1 | VHPEPGTWDSFLEK | 23                   | light  | 547.935 | 3 | b2         | 237.135  | 1 |
| SULT1A1 | VHPEPGTWDSFLEK | 16                   | light  | 547.935 | 3 | y6         | 738.367  | 1 |
| SULT1A1 | VHPEPGTWDSFLEK | 23                   | heavy  | 550.606 | 3 | b2         | 237.135  | 1 |
| SULT1A1 | VHPEPGTWDSFLEK | 16                   | heavy  | 550.606 | 3 | y6         | 746.381  | 1 |
| SULT1A1 | VHPEPGTWDSFLEK | 35                   | light  | 821.399 | 2 | b2         | 237.135  | 1 |
| SULT1A1 | VHPEPGTWDSFLEK | 35                   | heavy  | 825.406 | 2 | b2         | 237.135  | 1 |
| SULT1A2 | VYPHPGTWESFLEK | 19                   | light  | 563.947 | 3 | y5         | 623.340  | 1 |
| SULT1A2 | VYPHPGTWESFLEK | 12                   | light  | 563.947 | 3 | y12        | 714.351  | 1 |
| SULT1A2 | VYPHPGTWESFLEK | 19                   | light  | 563.947 | 3 | y10        | 1193.584 | 1 |
| SULT1A2 | VYPHPGTWESFLEK | 19                   | heavy  | 566.619 | 3 | y5         | 631.354  | 1 |
| SULT1A2 | VYPHPGTWESFLEK | 12                   | heavy  | 566.619 | 3 | y12        | 718.358  | 1 |
| SULT1A2 | VYPHPGTWESFLEK | 19                   | heavy  | 566.619 | 3 | y10        | 1201.598 | 1 |
| SULT1A3 | AHPEPGTWDSFLEK | 24                   | light  | 538.591 | 3 | b2         | 209.103  | 1 |
| SULT1A3 | AHPEPGTWDSFLEK | 15                   | light  | 538.591 | 3 | y5         | 623.340  | 1 |
| SULT1A3 | AHPEPGTWDSFLEK | 15                   | light  | 538.591 | 3 | b7         | 690.321  | 1 |
| SULT1A3 | AHPEPGTWDSFLEK | 15                   | light  | 538.591 | 3 | y6         | 738.367  | 1 |
| SULT1A3 | AHPEPGTWDSFLEK | 24                   | heavy  | 541.263 | 3 | b2         | 209.103  | 1 |
| SULT1A3 | AHPEPGTWDSFLEK | 15                   | heavy  | 541.263 | 3 | y5         | 631.354  | 1 |
| SULT1A3 | AHPEPGTWDSFLEK | 15                   | heavy  | 541.263 | 3 | b7         | 690.321  | 1 |
| SULT1A3 | AHPEPGTWDSFLEK | 15                   | heavy  | 541.263 | 3 | y6         | 746.381  | 1 |
| SULT1B1 | NLNDEILDR      | 19                   | light  | 551.280 | 2 | b2         | 228.134  | 1 |
| SULT1B1 | NLNDEILDR      | 21                   | light  | 551.280 | 2 | y3         | 403.230  | 1 |
| SULT1B1 | NLNDEILDR      | 19                   | light  | 551.280 | 2 | y7         | 874.426  | 1 |
| SULT1B1 | NLNDEILDR      | 19                   | heavy  | 556.285 | 2 | b2         | 228.134  | 1 |
| SULT1B1 | NLNDEILDR      | 21                   | heavy  | 556.285 | 2 | y3         | 413.238  | 1 |
| SULT1B1 | NLNDEILDR      | 19                   | heavy  | 556.285 | 2 | y7         | 884.435  | 1 |
| SULT1C2 | IVQETSFEK      | 18                   | light  | 540.782 | 2 | y5         | 611.304  | 1 |
| SULT1C2 | IVQETSFEK      | 16                   | light  | 540.782 | 2 | y6         | 740.346  | 1 |
| SULT1C2 | IVQETSFEK      | 14                   | light  | 540.782 | 2 | y7         | 868.405  | 1 |
| SULT1C2 | IVQETSFEK      | 18                   | heavy  | 544.789 | 2 | y5         | 619.318  | 1 |
| SULT1C2 | IVQETSFEK      | 16                   | heavy  | 544.789 | 2 | y6         | 748.360  | 1 |
| SULT1C2 | IVQETSFEK      | 14                   | heavy  | 544.789 | 2 | y7         | 876.419  | 1 |

|         |             |    |       |         |   |    |         |   |
|---------|-------------|----|-------|---------|---|----|---------|---|
| SULT1C4 | IVHYTSFDVMK | 20 | light | 447.229 | 3 | y2 | 278.153 | 1 |
| SULT1C4 | IVHYTSFDVMK | 23 | light | 447.229 | 3 | b3 | 350.219 | 1 |
| SULT1C4 | IVHYTSFDVMK | 13 | light | 447.229 | 3 | y4 | 492.249 | 1 |
| SULT1C4 | IVHYTSFDVMK | 20 | heavy | 449.900 | 3 | y2 | 286.167 | 1 |
| SULT1C4 | IVHYTSFDVMK | 23 | heavy | 449.900 | 3 | b3 | 350.219 | 1 |
| SULT1C4 | IVHYTSFDVMK | 13 | heavy | 449.900 | 3 | y4 | 500.263 | 1 |
| SULT1E1 | KPSEELVDR   | 22 | light | 536.785 | 2 | y8 | 472.738 | 2 |
| SULT1E1 | KPSEELVDR   | 26 | light | 536.785 | 2 | y7 | 847.416 | 1 |
| SULT1E1 | KPSEELVDR   | 26 | light | 536.785 | 2 | y8 | 944.468 | 1 |
| SULT1E1 | KPSEELVDR   | 22 | heavy | 541.789 | 2 | y8 | 477.742 | 2 |
| SULT1E1 | KPSEELVDR   | 26 | heavy | 541.789 | 2 | y7 | 857.424 | 1 |
| SULT1E1 | KPSEELVDR   | 26 | heavy | 541.789 | 2 | y8 | 954.477 | 1 |
| SULT2A1 | DEDVIILTYPK | 19 | light | 653.350 | 2 | y6 | 734.445 | 1 |
| SULT2A1 | DEDVIILTYPK | 18 | light | 653.350 | 2 | y7 | 847.529 | 1 |
| SULT2A1 | DEDVIILTYPK | 19 | light | 653.350 | 2 | y8 | 946.597 | 1 |
| SULT2A1 | DEDVIILTYPK | 19 | heavy | 657.358 | 2 | y6 | 742.459 | 1 |
| SULT2A1 | DEDVIILTYPK | 18 | heavy | 657.358 | 2 | y7 | 855.543 | 1 |
| SULT2A1 | DEDVIILTYPK | 19 | heavy | 657.358 | 2 | y8 | 954.611 | 1 |

Developmental Expression of the Cytosolic Sulfotransferases in Human Liver. Sarah Dubaisi, Joseph A. Caruso, Roger Gaedigk, Carrie A. Vyhlidal, Philip C. Smith, Ronald N. Hines, Thomas A. Kocarek, and Melissa Runge-Morris. Drug Metabolism and Disposition.

**Supplemental Table 5: Median Transcript per Million (TPM) values for *SULTs* analyzed by RNA-seq**

| <b><i>SULT</i> Transcript</b> | <b>Prenatal</b> | <b>Infant</b> | <b>1-2 years</b> | <b>2-5 years</b> | <b>6-11 years</b> | <b>12-18 years</b> |
|-------------------------------|-----------------|---------------|------------------|------------------|-------------------|--------------------|
| <i>SULT1A1 (TV1/2)</i>        | 11.01           | 14.41         | 4.44             | 9.80             | 10.98             | 17.87              |
| <i>SULT1A1 (TV3/4)</i>        | 0.62            | 0.59          | 0.38             | 0.41             | 0.86              | 1.44               |
| <i>SULT1A1 (TV5)</i>          | 0.06            | 0             | 0                | 0.13             | 0                 | 0.22               |
| <i>SULT1A2</i>                | 1.66            | 4.11          | 2.88             | 4.65             | 4.81              | 2.03               |
| <i>SULT1A3</i>                | 5.40            | 2.91          | 4.15             | 2.30             | 1.44              | 2.18               |
| <i>SULT1B1</i>                | 24.07           | 17.23         | 17.94            | 11.30            | 13.13             | 16.61              |
| <i>SULT1C2</i>                | 8.58            | 2.63          | 0.15             | 0.43             | 0.13              | 0.21               |
| <i>SULT1C3</i>                | 0.05            | 0             | 0                | 0                | 0                 | 0                  |
| <i>SULT1C4</i>                | 4.44            | 0.83          | 0.22             | 0.35             | 0.22              | 0.21               |
| <i>SULT1E1</i>                | 34.63           | 3.63          | 1.35             | 0.54             | 0.60              | 1.31               |
| <i>SULT2A1</i>                | 10.03           | 68.42         | 21.36            | 92.25            | 40.07             | 150.80             |
| <i>SULT2B1</i>                | 0.05            | 0.02          | 0                | 0                | 0                 | 0.02               |

Developmental Expression of the Cytosolic Sulfotransferases in Human Liver. Sarah Dubaisi, Joseph A. Caruso, Roger Gaedigk, Carrie A. Vyhlidal, Philip C. Smith, Ronald N. Hines, Thomas A. Kocarek, and Melissa Runge-Morris. Drug Metabolism and Disposition.

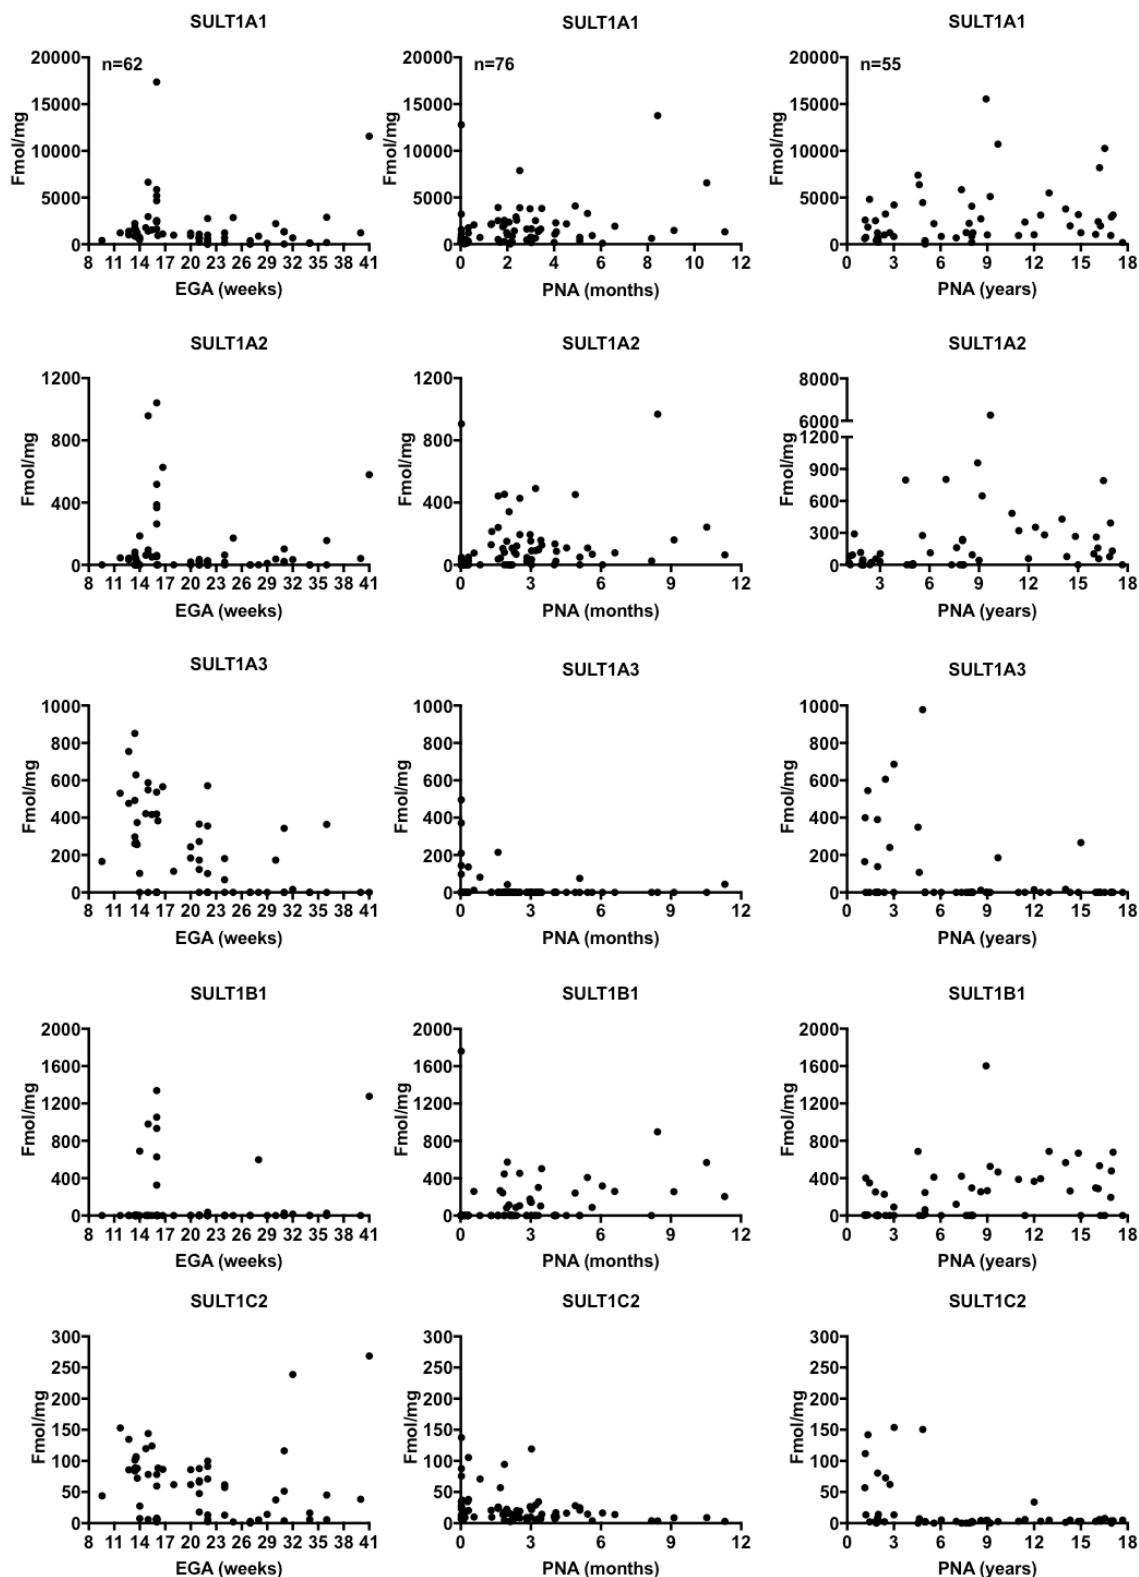



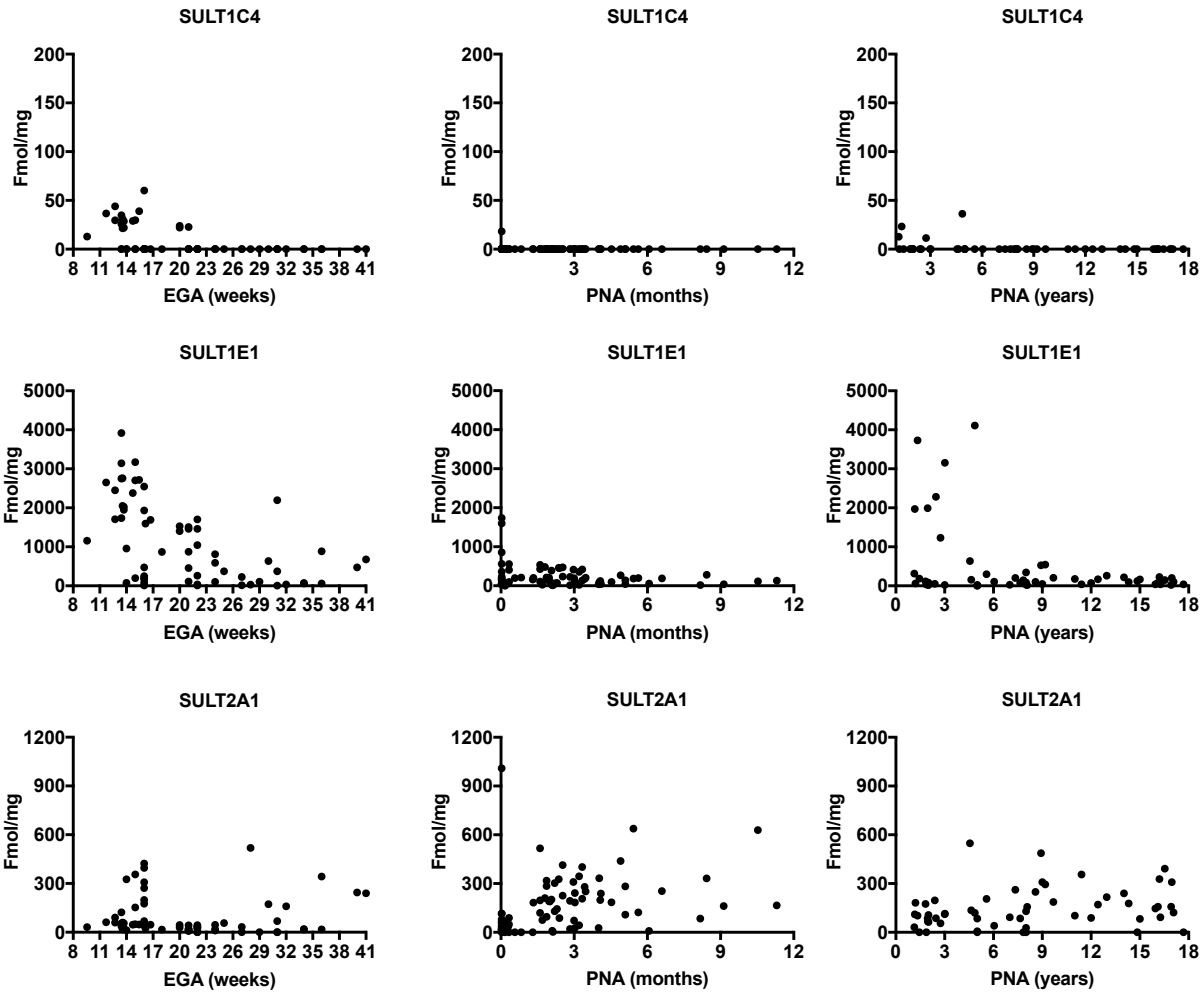

**Supplemental Figure 1. Developmental expression of SULT protein in human liver cytosols analyzed by targeted quantitative proteomics.** SULT protein contents (fmol/mg) are shown as scatter plots against age of the donor. Age was divided into three groups: prenatal [estimated gestational age (EGA) in weeks (left)], infant [postnatal age (PNA) in months (middle)], and 1-18 years-old (PNA in years, right).
